# Supplementary material for: Expression of GluK1c underlies the developmental switch in presynaptic kainate receptor function
Source: PubMed Central journal article supplement — Sci Rep. 2012 Mar 12;2:310. doi: 10.1038/srep00310 (PMC3298885; doi:10.1038/srep00310), 2012-03-12
Supplement: srep00310-s1.pdf [file srep00310-s1.pdf]

# Expression of GluK1c underlies the developmental switch in presynaptic kainate receptor function

Aino Vesikansa<sup>1,2</sup>, Prasanna Sakha<sup>1,2</sup>, Juha Kuja-Panula<sup>1</sup>, Svetlana Molchanova<sup>1,2</sup>, Claudio Rivera<sup>1,3</sup>, Henri J. Huttunen<sup>1</sup>, Heikki Rauvala<sup>1</sup>, Tomi Taira<sup>1,4</sup>, and Sari E. Lauri<sup>1,2,\*</sup>

1. Neuroscience Center, University of Helsinki, Finland
2. Department of Biosciences, Physiology, University of Helsinki, Finland
3. Université de la Méditerranée, UMR S901 Aix-Marseille 2, INMED (Institut de Neurobiologie de la Méditerranée), Marseille 13009, France
4. Department of Veterinary Biosciences, University of Helsinki, Finland

## SUPPLEMENTARY DATA

# Supplementary Figure 1

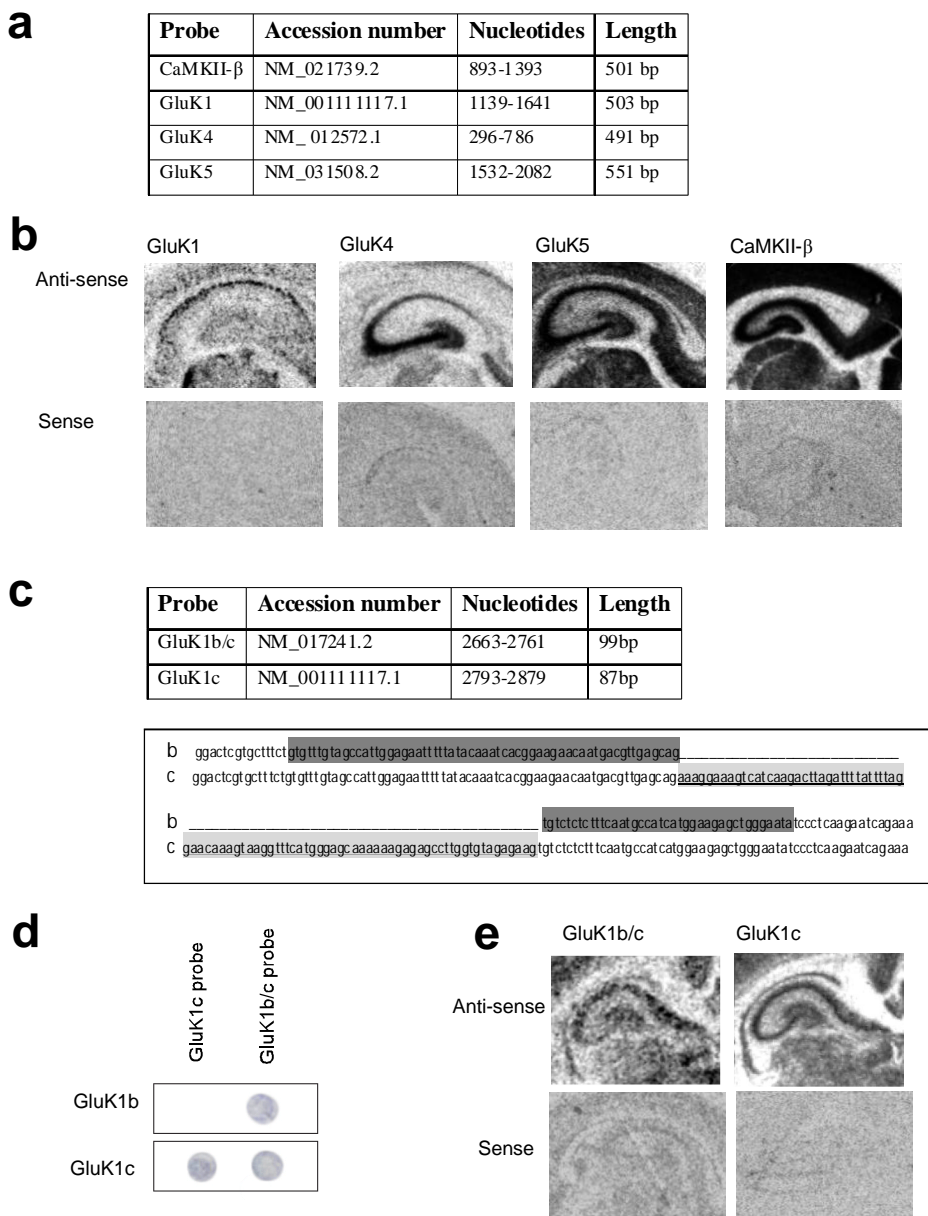

- The probes used for *in situ* hybridization.
- Autoradiography showing the signal with the various antisense and sense  $S^{35}$ -labeled probes at P3 hippocampal sections. No unspecific staining was detected with the sense- probes.
- The sequences of short oligonucleotide probes designed to differentiate between GluK1b- and c splice variants.
- Cross-reactivity of the short GluK1-probes used in *in situ* hybridization. Dot blot of digoxigenin-labeled GluK1b/c and GluK1c antisense probes against GluK1b and GluK1c mRNA.
- Autoradiography with the GluK1b/c and GluK1c antisense and sense  $S^{35}$ -labeled probes at P3 hippocampal sections. No unspecific staining was detected with the sense- probes.

## Supplementary methods:

For dot blotting, Flag-GluK1-2b/pcDNA3 and Flag-GluK1-2c/pcDNA3 were linearized with *Apa*I and transcribed *in vitro* using T7 RNA polymerase (mMessage mMachine-kit, Ambion). 5 ng of produced mRNA was pipetted into Hybond<sup>TM</sup>-N+ membrane (Amersham Biosciences) and crosslinked with UV. Hybridizations of DIG-labeled GluK-1b and GluK1-2c antisense probes were done overnight in DIG easy hybridization buffer (Roche Applied Science). After low (0.1xSSC, 0.1% SDS) and high (2xSSC, 0.1% SDS) stringency washes, membrane was incubated with anti-DIG-AP-antibody and detected with NBT/BCIP (Roche Applied Science).
